# Supplementary material for: [CuSn5Sb3]24− as a dual spherical–spherical aromatic heterometallic cluster bridged via an antiaromatic Cu2Sn2 motif
Source: Royal Society of Chemistry journal article supplement (doi:10.1039/d4cp03591g), 2024-12-26
Supplement: d4cp03591g1.pdf [file d4cp03591g1.pdf]

Supporting information for:

# **[CuSn<sub>5</sub>Sb<sub>3</sub>]<sub>2</sub><sup>4-</sup> as a Dual Spherical-Spherical Aromatic Heterometallic Cluster Bridged via an Antiaromatic Cu<sub>2</sub>Sn<sub>2</sub> Motif**

Peter L. Rodríguez-Kessler<sup>a</sup> and Alvaro Muñoz-Castro<sup>b\*</sup>

<sup>a</sup>*Centro de Investigaciones en Óptica A.C., Loma del Bosque 115, Col. Lomas del Campestre, León, Guanajuato, 37150, Mexico.*

<sup>b</sup>*Facultad de Ingeniería, Arquitectura y Diseño, Universidad San Sebastián, Bellavista 7, Santiago, 8420524, Chile.*

## **Content**

**Table S1.** Calculated <sup>119</sup>Sn-NMR parameters. Page S2

**Figure S1.** Calculated multicenter index for representative triangular faces of the studied [CuSn<sub>5</sub>Sb<sub>3</sub>]<sub>2</sub><sup>4-</sup>. Page S3

**Table S1.** Calculated  $^{119}\text{Sn}$ -NMR parameters in ppm, denoting a graphical representation of the different Sn-atom types in the studied cluster dimers.

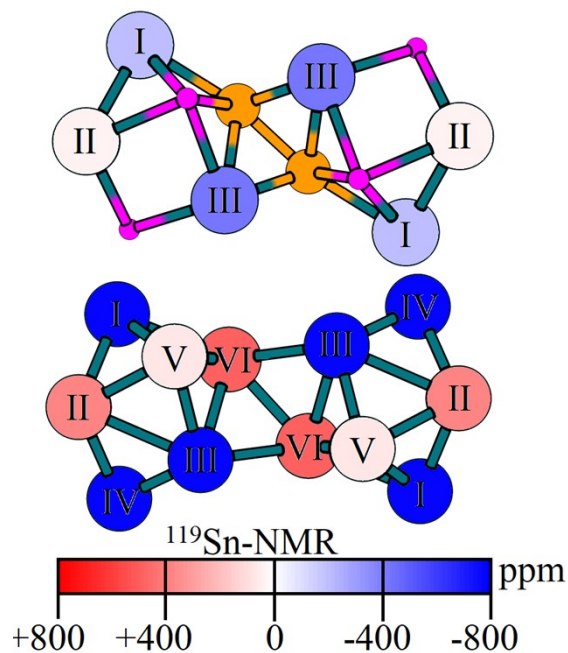

| $[\text{CuSn}_5\text{Sb}_3]_2^{4-}$ | $\sigma_{11}$ | $\sigma_{11}$ | $\sigma_{11}$ | $\sigma_{\text{iso}}$ | $^{119}\text{Sn } \delta$ |
|-------------------------------------|---------------|---------------|---------------|-----------------------|---------------------------|
| <b>Sn I</b>                         | 1900.4        | 3457.1        | 3909.6        | 3089.0                | -212.1                    |
| <b>Sn II</b>                        | 1257.1        | 2989.4        | 4241.2        | 2829.2                | 47.7                      |
| <b>Sn III</b>                       | 2228.8        | 3438.9        | 4169.8        | 3279.2                | -402.2                    |
|                                     |               |               |               |                       |                           |
| $[\text{Sn}_{18}]^{4-}$             |               |               |               |                       |                           |
| <b>Sn I</b>                         | 2432.6        | 4046.2        | 4675.9        | 3718.2                | -841.3                    |
| <b>Sn II</b>                        | 905.3         | 2646.1        | 3911.0        | 2487.5                | 389.5                     |
| <b>Sn III</b>                       | 2853.9        | 3572.2        | 4879.3        | 3768.5                | -891.5                    |
| <b>Sn IV</b>                        | 3494.9        | 4237.9        | 5414.4        | 4382.4                | -1505.5                   |
| <b>Sn V</b>                         | 1934.5        | 2557.9        | 3654.0        | 2715.5                | 161.5                     |
| <b>Sn VI</b>                        | -816.6        | 2550.0        | 5266.9        | 2333.5                | 543.5                     |
|                                     |               |               |               |                       |                           |

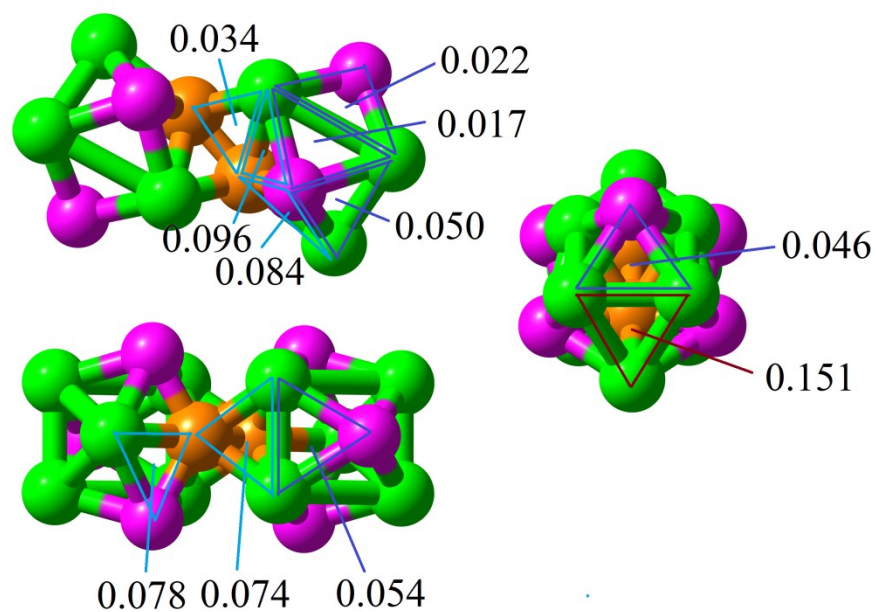

**Figure S1.** Calculated multicenter index for representative triangular faces of the studied  $[\text{CuSn}_5\text{Sb}_3]_2^{4+}$ , featuring two fused deltahedrons. Different views are showed for sake of clarity.

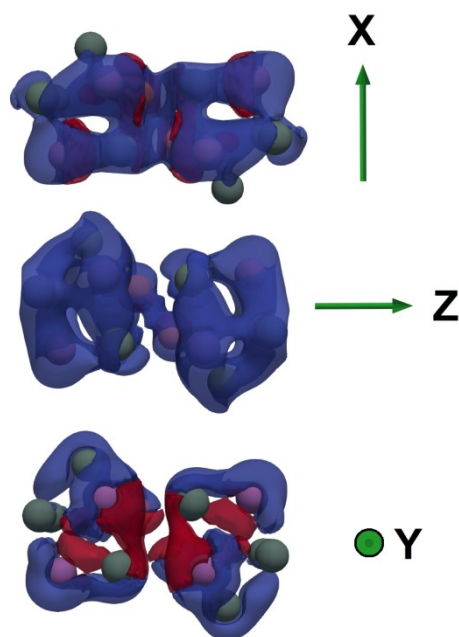

**Figure S2.** Calculated current density from GIMIC calculations with isosurface values of  $\pm 0.02$  nA/T, for different orientation of the applied field for  $[\text{CuSn}_5\text{Sb}_3]_2^{4+}$ . Blue: diatropic/ Red: Paratropic.

#### **Gaussian09 full citation**

Gaussian 09, Revision A.02, M. J. Frisch, G. W. Trucks, H. B. Schlegel, G. E. Scuseria, M. A. Robb, J. R. Cheeseman, G. Scalmani, V. Barone, G. A. Petersson, H. Nakatsuji, X. Li, M. Caricato, A. Marenich, J. Bloino, B. G. Janesko, R. Gomperts, B. Mennucci, H. P. Hratchian, J. V. Ortiz, A. F. Izmaylov, J. L. Sonnenberg, D. Williams-Young, F. Ding, F. Lipparini, F. Egidi, J. Goings, B. Peng, A. Petrone, T. Henderson, D. Ranasinghe, V. G. Zakrzewski, J. Gao, N. Rega, G. Zheng, W. Liang, M. Hada, M. Ehara, K. Toyota, R. Fukuda, J. Hasegawa, M. Ishida, T. Nakajima, Y. Honda, O. Kitao, H. Nakai, T. Vreven, K. Throssell, J. A. Montgomery, Jr., J. E. Peralta, F. Ogliaro, M. Bearpark, J. J. Heyd, E. Brothers, K. N. Kudin, V. N. Staroverov, T. Keith, R. Kobayashi, J. Normand, K. Raghavachari, A. Rendell, J. C. Burant, S. S. Iyengar, J. Tomasi, M. Cossi, J. M. Millam, M. Klene, C. Adamo, R. Cammi, J. W. Ochterski, R. L. Martin, K. Morokuma, O. Farkas, J. B. Foresman, and D. J. Fox, Gaussian, Inc., Wallingford CT, 2016.
